# Addressing disruptions in childhood routine immunisation services during the COVID-19 pandemic: perspectives and lessons learned from Liberia, Nepal, and Senegal

Sameer M Dixit,<sup>1\*</sup> Moussa Sarr,<sup>2\*</sup> Daouda M Gueye,<sup>2\*</sup> Kyle Muther,<sup>3\*</sup> T. Ruston Yarnko,<sup>3\*</sup> Robert A Bednarczyk,<sup>4</sup> Adolphus T Clarke,<sup>5</sup> Aliou Diallo,<sup>6</sup> Bonheur Dounebaine,<sup>4</sup> Anna Ellis,<sup>4</sup> Nancy Fullman,<sup>7†</sup> Nathaniel Gerthe,<sup>7</sup> Jhalak S Guatam,<sup>8</sup> Kyra Hester,<sup>4</sup> Gloria Ikilezi,<sup>7</sup> Souleymane Mboup,<sup>2</sup> Rajesh Man Rajbhandari,<sup>1</sup> David E Phillips,<sup>7\*</sup> Matthew C Freeman<sup>4\*</sup>

<sup>1</sup> Center for Molecular Dynamics Nepal (CMDN), Kathmandu, Nepal

<sup>2</sup> Institut de Recherche en Santé de Surveillance Epidémiologique et de Formations (IRESSEF), Dakar, Senegal

<sup>3</sup> Last Mile Health, Monrovia, Liberia

<sup>4</sup> Rollins School of Public Health, Emory University, Atlanta, Georgia, United States

<sup>5</sup> Expanded Programme on Immunisation, Ministry of Health, Monrovia, Liberia

<sup>6</sup> Expanded Programme on Immunisation Unit, World Health Organization Country Office, Dakar, Senegal

<sup>7</sup> Gates Ventures, Kirkland, Washington, United States

<sup>8</sup> Child Health and Immunization Section, Family Welfare Division, Department of Health Services, Ministry of Health and Population, Kathmandu, Nepal

\*Contributed equally

†Corresponding author:

Nancy Fullman

Gates Ventures

4110 Carillon Point

Kirkland, WA 98033

United States

[Nancy.Fullman@gatesventures.com](mailto:Nancy.Fullman@gatesventures.com)

**Word count:** 2,957

**Key words:** routine immunisation, COVID-19, childhood vaccines

## 43 **Abstract**

44 The COVID-19 pandemic has inflicted multifaceted disruptions to routine immunisation from global to local  
45 levels, affecting every aspect of vaccine supply, access, and demand. Since March 2020, country programmes  
46 have implemented a range of strategies to either continue vaccination services during COVID-19 measures like  
47 ‘lockdown’ and/or resume services when risks of SARS-CoV-2 transmission could be appropriately mitigated.  
48 Through the Exemplars in Global Health partnership in Liberia, Nepal, and Senegal, we conducted interviews  
49 with immunisation programme managers and ministry of health leadership to better understand how they have  
50 addressed the myriad vaccination challenges posed by the ongoing pandemic. From establishing alternative  
51 modes of service delivery to combatting vaccine distrust and rumours via risk communication campaigns, many  
52 routine immunisation programmes have demonstrated how to adapt, resume, and/or maintain vital vaccination  
53 efforts during the COVID-19 crisis. Yet millions of children remain un- or under-vaccinated worldwide, and the  
54 same programmes striving to implement catch-up services for missed doses and postponed mass campaigns will  
55 also soon be tasked with COVID-19 vaccine deployment. As laid bare by the current pandemic, the world’s gains  
56 against vaccine-preventable diseases are fragile: enshrined by a delicate global ecosystem of logistics, supply,  
57 and procurement, the success of routine immunisation ultimately rests upon dedicated programme staff, the  
58 resources and support available to them, and then the trust in and demand for vaccines by their recipients. Our  
59 collective lessons learned during COVID-19 offer insights in programme adaptation and resilience that, if  
60 prioritised, could strengthen equitable, sustainable vaccine delivery for all populations.

61

## 62 **Summary box**

- 63 • Key message 1: As the COVID-19 pandemic affected routine immunisation services worldwide, country  
64 programmes have used a range of mitigation strategies to maintain vaccine delivery and/or resume  
65 interrupted programming. Interviews with immunisation programme managers and Ministry of Health  
66 staff provided key perspectives and lessons learned on how countries have approached routine  
67 immunisation services during the COVID-19 crisis.
- 68 • Key message 2: Key themes for mitigating COVID-19’s effects on routine immunisation included  
69 prioritising continued services with strengthened infection prevention control; identifying alternative  
70 locations and approaches to providing vaccine services (e.g., conducting door-to-door vaccination if  
71 facility-based services were not possible); engaging in effective communications and mobilisation  
72 activities, especially to offset misinformation about COVID-19 and vaccines; setting up systems and  
73 strategies for reaching children who missed doses amid periods of disruption; and conducting catch-up  
74 campaigns as soon as SARS-CoV-2 transmission risks could be minimised.
- 75 • Key message 3: The ways in which COVID-19 has affected routine immunisation services have varied  
76 over time and across settings, underscoring the importance of contextually-tailored mitigation efforts  
77 and adaptation given evolving challenges amid an ongoing pandemic. As countries prepare and initiate  
78 roll-out COVID-19 vaccines, it will be vital to avoid one-size-fits-all implementation strategies and  
79 support the continuance of routine immunisation services through this next phase of COVID-19  
80 response.  
81  
82  
83  
84  
85  
86

## 87 Introduction

88 By the time WHO declared SARS-CoV-2 a pandemic on 11 March, 2020,[1] the virus responsible for COVID-19  
89 had claimed more than 4,200 lives and incurred over 118,300 confirmed infections in 114 countries.[2] As of 10  
90 January, 2021, the novel coronavirus has caused over 1.9 million deaths and 88.4 million infections globally,[3]  
91 with many countries still actively combatting surging caseloads and deaths. Beyond its direct toll, however, the  
92 COVID-19 pandemic has posed both immediate threats and potential longstanding consequences as countries  
93 sought to curb disease transmission. These include interrupted education and learning as schools closed for in-  
94 person instruction,[4] economic devastation as many business sectors followed suit,[5] and as increasingly  
95 recognised globally and nationally,[6] widespread disruptions in vital health services. In August 2020, 90% of 105  
96 countries surveyed by WHO reported at least some kind of disruption to health services during the pandemic.[6]  
97 Both demand and supply were disrupted (e.g., outpatient attendance fell amid lockdown measures, many clinics  
98 paused operations amid staff redeployment for COVID-19 response). Declines in health service utilisation may  
99 have been further fueled by fear of virus exposure and misinformation.[7,8]

100

101 Globally, routine immunisation emerged as one of more acutely affected health services,[6] a trend that could  
102 result in millions of children un- or under-vaccinated against preventable illness and death if left unaddressed.[9]  
103 The very nature of immunisation services – individuals receiving doses from trained vaccinators in close  
104 proximity to each other – makes them less directly amenable to telemedicine or other remote delivery options  
105 (e.g., medications sent by mail). Further, how countries may approach mitigating pandemic-related disruptions  
106 to immunisation services is likely to vary. Factors such as programme structure (e.g., regular use of mass  
107 vaccination campaigns and community outreach to complement facility-based services), composition of national  
108 immunisation schedules and plans for new vaccine introductions, supply chain requirements and dependencies,  
109 and vaccine sentiment may shape strategies to maintain or resume immunisation services amid the ongoing  
110 COVID-19 crisis. Together, they present formidable challenges to any country. At the same time, these  
111 challenges have also paved the ways for innovation, adaptations, and resilience in the ways that health workers,  
112 programme managers, and government leadership alike approach routine immunisation.

113

114 To better understand how COVID-19 has affected routine immunisation and the ways in which countries are  
115 responding, we used a two-pronged approach. First, we conducted interviews with expanded programme on  
116 immunisation (EPI) managers, government officials, and other key stakeholders in Liberia, Nepal, and Senegal.  
117 These three countries are part of the Exemplars in Global Health (EGH) programme,[10] an initiative focused on  
118 evaluating successes in global health programme implementation and investments, and disseminating lessons  
119 learned via partnership networks. The timing and scope of these interviews varied (Table 1), and they were  
120 selected by country EGH leadership. As such, they should be interpreted as individual insights into how each  
121 country's routine immunisation programmes have experienced and/or addressed the unique challenges posed  
122 by COVID-19 at the time of interview. These perspectives and experiences may not be shared by others across  
123 vaccine programmes in a given setting, and they may not represent challenges and/or mitigation strategies  
124 currently occurring in these contexts. Second, we synthesised these interviews into key themes across the three  
125 countries, supplementing thematic considerations *via* a pragmatic review of publicly available reports and  
126 documentation on how COVID-19 was affecting routine immunisation and corresponding mitigation efforts  
127 taken by the world more broadly. We primarily drew from individual country reports or data collated by global  
128 vaccine partners (e.g., WHO, UNICEF, Gavi, the Vaccine Alliance, Sabin Vaccine Institute) from July to September  
129 2020, with some additional searches in October and November 2020.

130 **Table 1. Summary of interviews conducted among routine immunisation programme and Ministry of Health**  
131 **leadership in Liberia, Nepal, and Senegal.** Interviews in Senegal and Nepal were conducted in French and  
132 Nepalese, respectively, and were translated into English.

133

| Country | Interview timing        | Interviewee(s)                                                                                                                                                                                                                                                               |
|---------|-------------------------|------------------------------------------------------------------------------------------------------------------------------------------------------------------------------------------------------------------------------------------------------------------------------|
| Liberia | July-August 2020        | <b>One interviewee:</b> <ul style="list-style-type: none"><li>• National-level EPI manager, Ministry of Health</li></ul>                                                                                                                                                     |
| Nepal   | July-August 2020        | <b>Two interviewees:</b> <ul style="list-style-type: none"><li>• Chief of Child Health and Immunisation Chief at the Family Welfare Division (FWD), Ministry of Health and Population (MoPH)</li><li>• One district Health Section Chief in charge of immunisation</li></ul> |
| Senegal | September-November 2020 | <b>Four interviewees:</b> <ul style="list-style-type: none"><li>• Two district-level EPI supervisors</li><li>• EPI focal point/WHO liaison with the Ministry of Health</li><li>• District-level physician, national COVID-19 response team</li></ul>                         |

134

135

136 In the sections that follow we share key insights and themes from Liberia, Nepal, and Senegal, as well as  
137 additional learnings to date. It is worth noting that the broader impacts of COVID-19 on routine immunisation  
138 may not be wholly known until months or even years from the present crisis. Similarly, the longer-term success  
139 of current efforts to maintain or resume critical vaccination services remains unclear; this is particularly true as  
140 epidemic trajectories have varied widely across settings over time and now many countries are preparing for  
141 COVID-19 vaccine deployment. Here we aim to bring together what has been reported to date; as more data are  
142 collected, analysed, and disseminated, we hope to collectively chart the different types of programmatic  
143 strategies and innovations that countries implemented to sustain vaccine delivery during the COVID-19 crisis.

144

### 145 **COVID-19 effects on childhood immunisation and country approaches**

146 The COVID-19 pandemic has disrupted key drivers of vaccine utilisation – community access, facility readiness,  
147 and intent to vaccinate[11] – as well as how these drivers interact to collectively support timely, effective  
148 vaccine services worldwide. On their own, each of these disruptions could negatively affect immunisation  
149 services and utilisation – together, they are poised to halt or even reverse the immense progress achieved in  
150 vaccine delivery. For instance, the September 2020 Goalkeepers report showed that 2020 coverage estimates of  
151 three doses of the diphtheria-tetanus-pertussis vaccine (DTP3) fell to levels last seen in the 1990s – “in other  
152 words, we’ve been set back by about 25 years in about 25 weeks.”[5]

153

154 Table 2 provides some examples of how these drivers have been affected in Liberia, Nepal, and Senegal, as well  
155 as other countries and globally, during the ongoing COVID-19 pandemic. These represent only a portion of the  
156 overarching theme surfacing in 2020: disruption of routine vaccine delivery has been widespread, and rapidly  
157 developing strategies to provide missed doses and close widening gaps in coverage is crucial.

158 **Table 2. Main types of disruptions on childhood vaccination during the COVID-19 pandemic.** All country examples and insights were  
 159 synthesised from interviews conducted by Exemplars in Global Health (EGH) country researchers or via desk research and pragmatic reviews.  
 160 Vaccine drivers are adapted from the Phillips and colleagues' framework on determinants of vaccination.[11,12]  
 161

| Vaccination driver                                                                                                                                                               | Examples of COVID-19 disruptions                                                                                                                                                                                                                                                                                                                                                                                                                                                                                | Country examples and insights                                                                                                                                                                                                                                                                                                                                                                                                                                                                                                                                                             |                                                                                                                                                                                                                                                                                                                                                                                                                                                                      |
|----------------------------------------------------------------------------------------------------------------------------------------------------------------------------------|-----------------------------------------------------------------------------------------------------------------------------------------------------------------------------------------------------------------------------------------------------------------------------------------------------------------------------------------------------------------------------------------------------------------------------------------------------------------------------------------------------------------|-------------------------------------------------------------------------------------------------------------------------------------------------------------------------------------------------------------------------------------------------------------------------------------------------------------------------------------------------------------------------------------------------------------------------------------------------------------------------------------------------------------------------------------------------------------------------------------------|----------------------------------------------------------------------------------------------------------------------------------------------------------------------------------------------------------------------------------------------------------------------------------------------------------------------------------------------------------------------------------------------------------------------------------------------------------------------|
|                                                                                                                                                                                  |                                                                                                                                                                                                                                                                                                                                                                                                                                                                                                                 | From EGH interviews in Liberia, Nepal, Senegal                                                                                                                                                                                                                                                                                                                                                                                                                                                                                                                                            | From desk research and pragmatic reviews                                                                                                                                                                                                                                                                                                                                                                                                                             |
| <b>Facility readiness:</b> health system supply and capacity, via health facilities, to adequately meet demand for vaccine services.                                             | <ul style="list-style-type: none"> <li>• Delayed shipments of vaccine stocks and key supplies due to travel restrictions and reduced flight availability.[13]</li> <li>• Deployment of facility staff for COVID-19 response and/or emergency management.</li> <li>• Reduced or halted service availability and/or hours of operation.</li> <li>• Inadequate PPE, sanitation and infection control supplies.</li> <li>• Staff shortages due to COVID-19 infections, fear of exposure, and/or burnout.</li> </ul> | <ul style="list-style-type: none"> <li>• Large number of immunisation centers ceased operations and outpatient departments were shut down due to COVID-19 cases among healthcare workers (<i>Nepal</i>)</li> <li>• Health facility-based outreach activities were suspended in response to growing vaccine hesitancy, which was fueled by rumours circulating on COVID-19 vaccines being tested on citizens (<i>Liberia</i>)</li> <li>• Health centre staff were tasked with COVID-19 management and response, reducing their availability for other services (<i>Senegal</i>)</li> </ul> | <ul style="list-style-type: none"> <li>• UNICEF reported a 70-80% reduction in planned vaccine shipments between the weeks of 22 March and 1 May 2020.[13]</li> <li>• Healthcare workers reported delays and/or inability to report to posts due to re-assignments to help with COVID-19 cases (<i>Philippines</i>)[14]</li> <li>• Delays in cold-chain equipment optimisation equipment and implementation (<i>multiple Gavi-eligible countries</i>)[15]</li> </ul> |
| <b>Intent to vaccinate:</b> demand for vaccines and/or vaccination services by caretakers that, in the absence of all other barriers, would result in children being vaccinated. | <ul style="list-style-type: none"> <li>• Fear of virus exposure at healthcare settings. [6]</li> <li>• Instructed to postpone or delay non-urgent healthcare services due to concerns about overburdening healthcare facilities.</li> <li>• Misinformation or rumours on COVID-19 and vaccination safety.</li> </ul>                                                                                                                                                                                            | <ul style="list-style-type: none"> <li>• Substantially reduced patient attendance for vaccine services, and even some refusal for care even when home visits were offered (<i>Senegal</i>)</li> <li>• Uptake of routine immunisation services declined amid early days of the country's State of Emergency and curfews (<i>Liberia</i>)</li> <li>• Rumours of 'eventual evil' COVID-19 vaccine trial in country (<i>Senegal</i>)</li> </ul>                                                                                                                                               | <ul style="list-style-type: none"> <li>• More than 50% of parents reluctant to bring children for immunisation services due to mistrust and rumors (<i>Côte d'Ivoire</i>)</li> <li>• Parents delayed children's vaccination schedules due to concerns about COVID-19 and potential transmission in crowded places (<i>Vietnam</i>)[16]</li> </ul>                                                                                                                    |
| <b>Community access:</b> ability to carry out vaccination via barriers and facilitators between facility readiness and vaccination intent.                                       | <ul style="list-style-type: none"> <li>• Postponement or cancellation of mass vaccination campaigns, as well as new vaccine introductions.</li> <li>• Restrictions on movement outside of residences and physical access to vaccine services due to social distancing policies and lockdown measures enacted to curb viral transmission.[9]</li> </ul>                                                                                                                                                          | <ul style="list-style-type: none"> <li>• Halted measles-rubella campaign in mid-April (<i>Nepal</i>)</li> <li>• School closures halted school-based HPV service delivery (<i>Senegal</i>)</li> <li>• Community-based outreach activities and mobilisation were prohibited (<i>Senegal</i>)</li> </ul>                                                                                                                                                                                                                                                                                     | <ul style="list-style-type: none"> <li>• Between March and April 2020, 27 countries postponed measles immunisation campaigns and 38 postponed mass polio vaccination efforts.[9]</li> <li>• 84% of health facilities reported immunisation services were severely disrupted, with reasons including transport disruptions and school closures due to COVID-19 restrictions (<i>Indonesia</i>) [17]</li> </ul>                                                        |

162

163 WHO has provided vital guidance on how to provide immunisation services amid COVID-19 since March  
164 2020,[18–21] of which countries have sought to incorporate and adapt in parallel.[22,23] Although WHO never  
165 wavered in its support of routine immunisations, its recommendations have evolved alongside the world’s  
166 evidence base on COVID-19 and how to weigh the relative risks of SARS-CoV-2 transmission against the costs of  
167 service disruption. In late March, for example, for countries with surging COVID-19 epidemics and without active  
168 measles or polio outbreaks, WHO recommendations viewed exposing healthcare workers and community  
169 members to this novel coronavirus as greater than temporarily postponing mass immunisation campaigns.[18]  
170 As the world’s understanding of COVID-19 improved and the magnitude of health service disruptions began to  
171 emerge (e.g., an estimated 80 million children under the age of 1 were thought to be affected interrupted  
172 immunisation services by May 2020[9]), WHO issued follow-up guidance on implementing mass vaccination  
173 campaigns[19] and principles for maintaining or resuming immunisation activities.[20,21] How countries have  
174 then acted – adapting such guidelines for local needs or developing their own mitigation strategies against  
175 COVID-19 disruptions based on prior experience or some combination of each – has become an area of great  
176 interest for programme managers, implementation scientists, and decision-makers alike.

177

178 Based on the interviews conducted in Liberia, Nepal, and Senegal, we report on more detail for each country’s  
179 unique challenges – and strategies – for routine immunisation during the COVID-19 pandemic.

180

181 ***A focus on Liberia: identifying key vaccination barriers, implementing risk communication strategies, and***  
182 ***augmenting safety measures and facility capacity for services***

183 As Liberia declared a 3-week state of emergency in April 2020 in response to its COVID-19 epidemic, another  
184 health crisis was growing: misinformation on COVID-19 and vaccines. Rumors that “a COVID-19 vaccine would  
185 be tested on people seeking routine immunisations” were spreading at a virus-like speed, and were seeding  
186 heightened vaccine hesitancy, reported the EPI manager. In parallel, vaccine coverage was falling: nationally,  
187 coverage of DTP3 and one dose of measles-containing vaccines (MCV1) was 17% and 20% lower, respectively,  
188 from January to April 2020 compared with the same time period in 2019.[24] Outbreaks of vaccine-preventable  
189 diseases were occurring in Lofa, Bong, and Sinoe counties, among others.

190

191 Concerned that the speed and magnitude of vaccine misinformation could have dire longer-term consequences  
192 on its broader immunisation programme, Liberia temporarily halted facility-based outreach services in  
193 communities and quickly pivoted toward generating evidence-informed approaches to address these emergent  
194 challenges. First, Liberia’s EPI team conducted a vaccine perception study Montessrado and Margibi counties,  
195 providing vital information on current obstacles for vaccine uptake. This study identified myths about COVID-19,  
196 limited trust in both new and routine vaccines, and delays in seeking vaccination services relative to  
197 immunisation schedules as among the countries’ primary barriers. Then, in collaboration with Gavi and other  
198 key partners, Liberia’s EPI developed a multi-stage communications plan, mapping key messages to target  
199 audiences, communication channels, and impact metrics for short-, medium-, and long-term objectives. These  
200 activities are currently being implemented across the country.

201

202 Resuming routine immunisation services in Liberia has involved careful protocols, supply acquisition, and catch-  
203 up immunisation activities. Drawing from WHO guidance, Liberia’s EPI produced a country-specific Infection  
204 Prevention and Control (IPC) Guide and implemented training at facilities for vaccinators to support safe  
205 administration practices and reduce exposure risk.[18,25] As of August 2020, eleven counties have received  
206 “periodic intensification of routine immunisation,” which involves campaign-oriented vaccination sessions with

207 the purpose of catching-up on missed doses. Importantly, Liberia’s EPI team has been actively working with  
208 partners to ensure that vaccinators have access to at least basic personal protective equipment (PPE), which is  
209 also vital to strengthening trust among individuals as they return to facilities for services and/or are met by  
210 vaccinators *via* community outreach campaigns. EPI has also installed Solar Direct Drive cold chain equipment at  
211 facilities, investments that benefit both the resumption of routine immunisation services and potentially  
212 preparations for COVID-19 vaccine rollout in 2021. A full rebound in service delivery may take months or longer,  
213 but Liberia’s EPI is dedicated to delivering for the country’s children; as reported by the EPI manager,  
214 “protection of a child against vaccine preventable diseases is a basic right of a child and as such frantic efforts  
215 must be [made] to restore and sustain routine immunisation.”

216

217 ***A focus on Nepal: maintaining routine immunisation services where possible, resuming vaccination campaigns***  
218 ***with heightened safety protocols, and ensuring safe practices amid strong demand for vaccination***

219 Nepal enacted lockdown measures at the end of March 2020 and maintained them through much of July  
220 2020,[26] actions considered necessary to contain the novel coronavirus but not ones without consequences for  
221 health services and specifically vaccination. For example, about 50% of the country’s immunisation service  
222 centers ceased operations during lockdown, falling from approximately 16,000 nationwide to 8,000. Hospitals,  
223 including their outpatient departments, had to shut down frequently from COVID-19 cases among healthcare  
224 professionals. A measles-rubella campaign was halted mid-way through April 2020 due to safety concerns, and  
225 measles outbreaks in 4 of Nepal’s 77 districts were thought to have stemmed from early disruptions to  
226 immunisation services.

227

228 Nonetheless, Nepal’s Ministry of Health and Population sought to maintain routine immunisation activities  
229 wherever possible, directing its Family Welfare Division (FWD) – the agency responsible for vaccination services  
230 – to implement safety protocols and adapt service provision as needed. For instance, the FWD conducted  
231 outbreak response immunisation (ORI) in districts affected by measles outbreaks, and strengthened monitoring  
232 of both measles and other seasonal vaccine-preventable diseases (e.g., tetanus and encephalitis). Local  
233 immunisation committees set up 94 ORI centers in affected districts, aiming to ensure that these services were  
234 within a 30-minute walk for the majority of populations. Such rapid set-up and implementation was no small  
235 feat, given Nepal’s often remote communities and treacherous terrain amid them; in fact, Nepal’s community  
236 health workers are known to walk 2-3 hours between settlements and cover 200 households at a time during  
237 vaccine campaigns.[27,28]

238

239 The nationwide measles-rubella campaign resumed in June 2020, and Nepal introduced the rotavirus vaccine in  
240 early July – all during the extended lockdown period. Introducing the rotavirus vaccine required careful, as well  
241 as creative, coordination with Gavi to procure and deliver the vaccines and other supplies *via* aircraft, and then  
242 to support maximum safety and infection control at immunisation sessions known for their “high-crowd pulling  
243 power.”[29] Community vaccine demand and acceptance is very high in Nepal, an achievement associated with  
244 the country’s longstanding community health worker programmes (e.g., Female Community Health Volunteers)  
245 and strong cultural norms around vaccination. “Despite lockdown, large numbers of [the] public showed up at  
246 immunisation centers that were open to vaccinate their children,” reported the Child Health and Immunisation  
247 Chief at the FWD. To safely continue routine immunisation amid such high demand, the Nepal government  
248 developed PPE guidelines, and ensured that all vaccinators received masks and eyewear, and full PPE whenever  
249 possible (i.e., gloves, footwear, overalls in addition to masks and eyewear). Formal training on IPC was  
250 conducted and distancing measures were implemented prior to field mobilisation efforts as campaigns resumed.

251 ***A focus on Senegal: overcoming disruptions in vaccination demand and community mobilisation with effective***  
252 ***communications and training, locally-adapted guidelines and safety practices, catch-up outreach services***

253 In spring 2020, Senegal’s health workforce was busy not only responding to COVID-19 demands but also  
254 adapting WHO guidelines to local needs and implementing sanitation and safety protocols to ensure continued  
255 essential service delivery at health centers and clinics. Facility staff developed IPC protocols, established physical  
256 distancing measures and procured PPE, and ran or participated in training webinars coordinated with national-  
257 level programmes to prepare for immunisation service delivery during the pandemic. During these preparations  
258 and protocol implementation, however, key challenges surfaced: in addition to facility staff being deployed  
259 COVID-19 management, demand for vaccine services plummeted and Senegal’s usual delivery platforms and  
260 mobilisation activities for routine immunisations were no longer viable amid lockdown measures.

261  
262 Schools were closed, halting HPV vaccine delivery as schools are Senegal’s main platform for HPV vaccination.  
263 Community-based organisations (CBOs) and multiple types of community health workers serve as the backbone  
264 to many of Senegal’s primary care and child health services, and have been recognised as vital to Senegal’s child  
265 health successes. But during the COVID-19 crisis, community mobilisation activities – such as that of the  
266 *Badiènou Gokh* to promote vaccination via music and in-person communication campaigns – and outreach-  
267 based services were prohibited. Patient attendance at facilities also substantially declined, likely from a  
268 combination of restrictions of movement and concerns about COVID-19 exposure. “Patients had deserted the  
269 health centers for fear of being infected....we could stay for a week without receiving a patient,” said one  
270 interviewee, an immunisation supervisor. Staff would call families and arrange for community workers to visit  
271 their homes with full protective equipment, yet in some cases, rumors about COVID-19 and vaccine reliability  
272 prompted families to still refuse immunisation services.

273  
274 To overcome these challenges, Senegal’s routine immunisation staff are re-starting mobilisation efforts with  
275 careful compliance to IPC, reduced numbers of individuals at any given time, and proper physical distancing  
276 measures. Such work has been informed by the Ministry of Health and Social Actions (MHSA) instructions, which  
277 was sent to all regions and health centers, and tailoring existing guidelines to align with local needs and  
278 strategies across the country’s health system levels. Media campaigns and broadcasting from cable channels,  
279 local TV channels, and radio spots are emphasising the importance of childhood immunisation as EPI  
280 programmes are once more scaling up outreach services. Efforts to implement continuous vaccination services  
281 outside of health posts in collaboration with CBOs are seeing some success, especially as clinics and outreach  
282 programmes have sought to provide greater flexibility in the timing of visit scheduling and location for catch-up  
283 doses. In addition, district-level records are enabling clinic staff to send text reminders or phone caretakers of  
284 children who have missed scheduled immunisation visits. As of November 2020, interviewees indicated that  
285 school-based HPV vaccination has yet to resume; however, they also report that community health workers  
286 have begun house-to-house vaccination efforts against HPV. While many obstacles persist, especially as the  
287 world continues to battle COVID-19, the dedication of Senegal’s health workers to identifying and implementing  
288 solutions for reaching every child was a unifying thread across these interviews. “Let’s immunise our children,  
289 the vaccines are there....The government has done everything to make these vaccines available for us, so let’s  
290 immunise our children. This is my only cry from the heart” one interviewee, a health facility EPI supervisor, said  
291 as their final statement.

292  
293 ***Key mitigation themes and implications for COVID-19 vaccine rollout***



294 As highlighted by Liberia, Nepal, and Senegal, the COVID-19 pandemic has affected routine immunisation  
295 services differently across countries – and they, in turn, have approached maintaining and/or resuming  
296 vaccination services in myriad ways as well. None of these findings should be surprising, especially to  
297 immunisation programme managers, ministry leadership, and vaccine partners – the complexities of vaccine  
298 delivery and how they intersect with deeply held sociocultural mores, political commitment, and technical  
299 requirements make locally-relevant and tailored programmes fundamental to any successful immunisation  
300 effort. Yet at a time when the world is rapidly pivoting to COVID-19 vaccine roll-out, we – collectively – risk  
301 viewing such efforts in a one-size-fits-all mentality and losing vital lessons learned on vaccine service provision  
302 during the earlier phases of the COVID-19 pandemic.

303 Specific logistics and implementation approaches for COVID-19 vaccine roll-out will likely deviate from routine  
304 immunisation services, ranging from the populations targeted and phases of prioritisation to cold-chain and  
305 dosing schedules. At the same time, COVID-19 vaccines will be scaled up amid ongoing, if not rising, SARS-CoV-2  
306 transmission in many countries, and similar to routine immunisation, multifaceted mitigation, communications,  
307 and demand-generation activities will be necessary to ensure optimal service provision and safety for all. Table 3  
308 aims to summarise some of the key mitigation themes across Liberia, Nepal, and Senegal, in addition to  
309 supplementary examples from other locations. Not every approach was used or needed in each country, just as  
310 COVID-19 affected routine immunisation in different ways across settings. What unites these diverse settings  
311 and programmes is the recognition that each level of vaccination barriers or facilitators must be addressed, from  
312 patient demand and trust to community access; the willingness to adapt and test alternative approaches; and  
313 the overarching dedication to providing routine immunisation to all.

## 314 **Conclusions**

315 The COVID-19 pandemic has threatened progress made in child health worldwide, posing widespread  
316 disruptions and challenges to routine immunisation programmes, healthcare providers, and patients alike.  
317 Programmatic lessons learned through this global crisis are only as beneficial as our collective efforts to  
318 collaborate and rethink approaches to promoting programme resilience, equity, and sustainability for both  
319 immunisation and preparedness more broadly. In the coming months, every country – rich and poor, Global  
320 South and North – will face its next reckoning of COVID-19: mass deployment of COVID-19 vaccines amid  
321 ongoing, or even surging, epidemics and SARS-CoV-2 transmission. How we collectively approach routine  
322 immunisation services and vaccine campaigns, from local to global levels, will ultimately determine how the  
323 remainder of this pandemic will unfold.

324 **Table 3. Main mitigation themes for addressing COVID-19 effects on routine immunisations.** All country examples and insights were  
 325 synthesised from interviews conducted by Exemplars in Global Health (EGH) country researchers or via desk research and pragmatic reviews.  
 326

|                                                                                                                                                                          | Country examples and insights                                                                                                                                                                                                                                                                                                                                                                                           |                                                                                                                                                                                                                                                                                                                                                                                                                                                                                                                                                                                                                                                                                                                                                                                                                                                                                                                                                                                                      |
|--------------------------------------------------------------------------------------------------------------------------------------------------------------------------|-------------------------------------------------------------------------------------------------------------------------------------------------------------------------------------------------------------------------------------------------------------------------------------------------------------------------------------------------------------------------------------------------------------------------|------------------------------------------------------------------------------------------------------------------------------------------------------------------------------------------------------------------------------------------------------------------------------------------------------------------------------------------------------------------------------------------------------------------------------------------------------------------------------------------------------------------------------------------------------------------------------------------------------------------------------------------------------------------------------------------------------------------------------------------------------------------------------------------------------------------------------------------------------------------------------------------------------------------------------------------------------------------------------------------------------|
|                                                                                                                                                                          | From EGH interviews in Liberia, Nepal, Senegal                                                                                                                                                                                                                                                                                                                                                                          | From desk research and pragmatic reviews                                                                                                                                                                                                                                                                                                                                                                                                                                                                                                                                                                                                                                                                                                                                                                                                                                                                                                                                                             |
| <b>Theme 1:</b> Prioritise continued immunisation services at both national and local levels.                                                                            | <ul style="list-style-type: none"> <li>Supported uninterrupted routine immunisation services by national government and local authorities, even during lockdown periods (<i>Nepal, Senegal</i>)</li> <li>Introduced rotavirus vaccine in July 2020, during a national lockdown period (<i>Nepal</i>)</li> </ul>                                                                                                         | <ul style="list-style-type: none"> <li>Conducted routine immunisations at fixed sites with physical distancing during national lockdown (<i>Laos</i>)[9]</li> <li>Sought to maintain routine immunisation services via strong engagement with religious and community leaders and trainings on vaccine-preventable disease surveillance for volunteers (<i>Afghanistan</i>)[30]</li> </ul>                                                                                                                                                                                                                                                                                                                                                                                                                                                                                                                                                                                                           |
| <b>Theme 2:</b> Conduct effective communications and outreach efforts to combat misinformation and engender trust in COVID-19 guidance and routine immunisation efforts. | <ul style="list-style-type: none"> <li>Developed and now currently implementing risk communication strategic action plan to address widespread rumors and vaccine hesitancy identified through a vaccine perception study (<i>Liberia</i>)</li> <li>Conducted communication campaigns and mobilisation efforts via multiple media channels emphasising the importance of childhood vaccines (<i>Senegal</i>)</li> </ul> | <ul style="list-style-type: none"> <li>Conducted virtual campaigns with the President and Minister of Health via social media (<i>Paraguay</i>)[31]</li> <li>Dispatched mobile teams of community health workers with longstanding ties to communities targeted for outreach (<i>Cambodia</i>) [32]</li> <li>Ministry of Health leveraged mass media to inform populations that essential health services had resumed, including vaccination, and urged community members to bring children to clinics (<i>Sri Lanka</i>) [33]</li> </ul>                                                                                                                                                                                                                                                                                                                                                                                                                                                            |
| <b>Theme 3:</b> Identify alternative locations, infrastructure, and service delivery platforms outside of traditional health clinics.                                    | <ul style="list-style-type: none"> <li>Offered alternative hours for vaccine administration (e.g., after work, during the weekends) (<i>Senegal</i>)</li> <li>Set up outbreak response immunisation centers in districts with outbreaks to facilitate faster catch-up and response immunisation (<i>Nepal</i>)</li> </ul>                                                                                               | <ul style="list-style-type: none"> <li>Set up vaccination posts in empty locations due to lockdown measures (e.g., schools) (<i>Brazil</i>)[31]</li> <li>Conducted drive-through and home-based vaccination services (<i>Brazil, Chile, El Salvador</i>)[31]</li> <li>Deployed “immunisation brigades” to high-risk populations at nursing homes and jails (<i>Bolivia</i>)[31]</li> </ul>                                                                                                                                                                                                                                                                                                                                                                                                                                                                                                                                                                                                           |
| <b>Theme 4:</b> Institute infection prevention controls and physical distancing measures, and adapt service provision practices accordingly.                             | <ul style="list-style-type: none"> <li>Developed locally tailored IPD guidelines and trainings for vaccinators (<i>Liberia, Senegal</i>)</li> <li>Improved the provision of basic PPE and other supplies for vaccinators via country partners (<i>Liberia</i>)</li> </ul>                                                                                                                                               | <ul style="list-style-type: none"> <li>Trained polio vaccine workers to administer vaccines without touching children, alongside provision of full PPE (<i>Pakistan</i>)[34]</li> <li>Introduced rotavirus vaccine via a phased province-by-province approach rather than the centralised introduction model, advising people not to travel outside of their home provinces to reduce transmission risk (<i>Solomon Islands</i>)[35]</li> <li>Repurposed government cars into shuttles to drive patients and caregivers to clinics to access health services including immunisations (<i>Uganda</i>)[30]</li> <li>Limited patients to one child or family per hour for immunisation services, and sought to give multiple catch-up vaccinations and/or vaccinate all children in a given family per visit when possible (<i>Sri Lanka</i>) [32,33]</li> <li>Set up tents outside of health centers to separate people seeking vaccination from patients who are ill (<i>Paraguay</i>)[31]</li> </ul> |

|                                                                                                                                     |                                                                                                                                                                                                                                                                                                                                                                              |                                                                                                                                                                                                                                                                                                                                                                                        |
|-------------------------------------------------------------------------------------------------------------------------------------|------------------------------------------------------------------------------------------------------------------------------------------------------------------------------------------------------------------------------------------------------------------------------------------------------------------------------------------------------------------------------|----------------------------------------------------------------------------------------------------------------------------------------------------------------------------------------------------------------------------------------------------------------------------------------------------------------------------------------------------------------------------------------|
|                                                                                                                                     |                                                                                                                                                                                                                                                                                                                                                                              | <ul style="list-style-type: none"> <li>Extended mass measles campaign of 14.4 million children to a longer time period to limit crowding, and conducted vaccinations in outside, well-ventilated areas with physical distancing and sanitation protocols (<i>Ethiopia</i>)[36]</li> </ul>                                                                                              |
| <p><b>Theme 5:</b> Set up systems to track missed doses – and target follow-up efforts – in areas with the largest disruptions.</p> | <ul style="list-style-type: none"> <li>Conduct house-to-house vaccination for HPV services amid continued closures of schools (<i>Senegal</i>)</li> <li>Based on contact records kept at district offices, text or phone parents whose children have missed immunisation visits (<i>Senegal</i>)</li> </ul>                                                                  | <ul style="list-style-type: none"> <li>Tracked children who missed doses and sent text messages about service resumption via its Electronic Immunisation Registry (EIR) mobile application (<i>Karachi, Pakistan</i>)[37]</li> <li>Phoned parents of children with missed vaccination and scheduling home visits as needed (<i>Ghana</i>)[38]</li> </ul>                               |
| <p><b>Theme 6:</b> Conduct catch-up campaigns as soon as SARS-CoV-transmission risks can be effectively mitigated.</p>              | <ul style="list-style-type: none"> <li>Conducted “periodic intensification of routine immunisation” (i.e., campaign-style vaccine services) in at least eleven districts by August 2020 (<i>Liberia</i>)</li> <li>Resumed measles-rubella mass vaccination campaign in June 2020 after halting activities in mid-April due to safety concerns (<i>Nepal</i>) [32]</li> </ul> | <ul style="list-style-type: none"> <li>Resumed postponed polio vaccination campaigns with extensive PPE and safety protocols, including Syria in June,[28,32] Burkina Faso,[39] and Pakistan[34] in July, among others.</li> <li>Leveraged June 2020 Child Health Week to include catch-up campaigns for inactivated polio vaccines and HPV vaccination (<i>Zambia</i>)[35]</li> </ul> |

## 328 **Acknowledgments**

329 We are deeply grateful for the time and responses provided by all interviewees and interviewers, especially as  
330 they conduct vital work amid the COVID-19 pandemic. We would like to acknowledge Nepal's Ministry of Health  
331 and Population and the WHO Nepal Immunization Preventable Diseases section; Senegal's Ministry of Health  
332 and Social Actions and the WHO Country Office in Senegal; and Liberia's Ministry of Health. The Exemplars in  
333 Global Health programme is a partnership including the institutional affiliations of the authors listed here as well  
334 as country research partners. The authors acknowledge contributions of all partners involved, which also include  
335 country leadership overseeing research collaborations in Liberia, Nepal, and Senegal; Anna Rapp and Ethan  
336 Wong of the Bill & Melinda Gates Foundation; and Daniel Beaulieu, Niranjana Bose, and Oliver Rothschild at  
337 Gates Ventures. Additionally, we thank Angela Hwang for her critical perspectives and feedback on routine  
338 immunisation programmes and drafting of the manuscript. The Exemplars in Global Health Vaccine Delivery  
339 project, coordinated by Emory University, is funded by the Bill & Melinda Gates Foundation in conjunction with  
340 Gates Ventures.

341

342

343

344

## 345 **References**

- 346 1 Cucinotta D, Vanelli M. WHO Declares COVID-19 a Pandemic. *Acta Bio-Medica Atenei Parm* 2020;**91**:157–60.  
347 doi:10.23750/abm.v91i1.9397
- 348 2 World Health Organization (WHO). Coronavirus disease 2019 (COVID-19): Situation Report 51. Geneva,  
349 Switzerland: : WHO 2020. [https://www.who.int/docs/default-source/coronaviruse/situation-](https://www.who.int/docs/default-source/coronaviruse/situation-reports/20200311-sitrep-51-covid-19.pdf?sfvrsn=1ba62e57_10)  
350 [reports/20200311-sitrep-51-covid-19.pdf?sfvrsn=1ba62e57\\_10](https://www.who.int/docs/default-source/coronaviruse/situation-reports/20200311-sitrep-51-covid-19.pdf?sfvrsn=1ba62e57_10)
- 351 3 World Health Organization (WHO). COVID-19 Weekly Epidemiological Update: 12 January 2021. Geneva,  
352 Switzerland: : WHO 2021. [https://www.who.int/publications/m/item/weekly-epidemiological-update---](https://www.who.int/publications/m/item/weekly-epidemiological-update---12-january-2021)  
353 [january-2021](https://www.who.int/publications/m/item/weekly-epidemiological-update---12-january-2021) (accessed 13 Jan 2021).
- 354 4 UNICEF. What Have We Learnt? Overview of findings from a survey of ministries of education on national  
355 responses to COVID-19. New York, NY, USA: : UNICEF 2020. [https://data.unicef.org/resources/national-](https://data.unicef.org/resources/national-education-responses-to-covid19/)  
356 [education-responses-to-covid19/](https://data.unicef.org/resources/national-education-responses-to-covid19/)
- 357 5 Bill & Melinda Gates Foundation (BMGF). 2020 Goalkeepers Report. COVID-19: A Global Perspective.  
358 Seattle, WA, USA: : BMGF 2020. <https://www.gatesfoundation.org/goalkeepers/report/2020-report>
- 359 6 World Health Organization (WHO). Pulse survey on continuity of essential health services during the COVID-  
360 19 pandemic: interim report. Geneva, Switzerland: : WHO 2020. [https://www.who.int/publications-detail-](https://www.who.int/publications-detail-redirect/WHO-2019-nCoV-EHS_continuity-survey-2020.1)  
361 [redirect/WHO-2019-nCoV-EHS\\_continuity-survey-2020.1](https://www.who.int/publications-detail-redirect/WHO-2019-nCoV-EHS_continuity-survey-2020.1) (accessed 4 Sep 2020).
- 362 7 World Health Organization (WHO). Novel Coronavirus (2019-nCoV): Situation Report 13. Geneva,  
363 Switzerland: : WHO 2020. [https://www.who.int/docs/default-source/coronaviruse/situation-](https://www.who.int/docs/default-source/coronaviruse/situation-reports/20200202-sitrep-13-ncov-v3.pdf?sfvrsn=195f4010_6)  
364 [reports/20200202-sitrep-13-ncov-v3.pdf?sfvrsn=195f4010\\_6](https://www.who.int/docs/default-source/coronaviruse/situation-reports/20200202-sitrep-13-ncov-v3.pdf?sfvrsn=195f4010_6)

- 365 8 The Risks of Misinformation and Vaccine Hesitancy within the Covid-19 Crisis.  
366 <https://www.csis.org/analysis/risks-misinformation-and-vaccine-hesitancy-within-covid-19-crisis> (accessed  
367 4 Sep 2020).
- 368 9 UNICEF. At least 80 million children under one at risk of diseases such as diphtheria, measles and polio as  
369 COVID-19 disrupts routine vaccination efforts, warn Gavi, WHO and UNICEF.  
370 2020.[https://www.unicef.org/press-releases/least-80-million-children-under-one-risk-diseases-such-](https://www.unicef.org/press-releases/least-80-million-children-under-one-risk-diseases-such-diphtheria-measles-and-polio)  
371 [diphtheria-measles-and-polio](https://www.unicef.org/press-releases/least-80-million-children-under-one-risk-diseases-such-diphtheria-measles-and-polio) (accessed 3 Aug 2020).
- 372 10 Exemplars in Global Health. [exemplars.health](https://www.exemplars.health/). <https://www.exemplars.health/> (accessed 3 Sep 2020).
- 373 11 Phillips DE, Dieleman JL, Lim SS, *et al.* Determinants of effective vaccine coverage in low and middle-income  
374 countries: a systematic review and interpretive synthesis. *BMC Health Serv Res* 2017;**17**:681.  
375 doi:10.1186/s12913-017-2626-0
- 376 12 Phillips DE, Dieleman JL, Shearer JC, *et al.* Childhood vaccines in Uganda and Zambia: Determinants and  
377 barriers to vaccine coverage. *Vaccine* 2018;**36**:4236–44. doi:10.1016/j.vaccine.2018.05.116
- 378 13 UNICEF. Geneva Palais briefing note on the impact of COVID-19 mitigation measures on vaccine supply and  
379 logistics. 2020.[https://www.unicef.org/press-releases/geneva-palais-briefing-note-impact-covid-19-](https://www.unicef.org/press-releases/geneva-palais-briefing-note-impact-covid-19-mitigation-measures-vaccine-supply-and)  
380 [mitigation-measures-vaccine-supply-and](https://www.unicef.org/press-releases/geneva-palais-briefing-note-impact-covid-19-mitigation-measures-vaccine-supply-and) (accessed 3 Aug 2020).
- 381 14 BrandRoom I net. Missed a vaccine? It's time to bounce back! INQUIRER.net.  
382 2020.<https://globalnation.inquirer.net/190451/missed-a-vaccine-its-time-to-bounce-back> (accessed 11 Dec  
383 2020).
- 384 15 Gavi, the Vaccine Alliance. COVID-19 Situation Report 8. Geneva, Switzerland: : Gavi 2020.  
385 <https://www.gavi.org/sites/default/files/document/2020/Gavi-COVID-19-Situation-Report-8-05052020.pdf>
- 386 16 COVID-19 Situation Report 10. Geneva, Switzerland: : Gavi 2020.  
387 <https://www.gavi.org/sites/default/files/document/2020/Gavi-COVID-19-Situation-Report-10-20200602.pdf>
- 388 17 UNICEF. Rapid Assessment: Impact of COVID-19 Pandemic on Immunization Services in Indonesia. New York,  
389 NY, USA: : UNICEF 2020.  
390 [https://www.unicef.org/indonesia/media/4811/file/Rapid%20Assessment:%20Impact%20of%20COVID-](https://www.unicef.org/indonesia/media/4811/file/Rapid%20Assessment:%20Impact%20of%20COVID-19%20Pandemic%20on%20Immunization%20Services%20in%20Indonesia.pdf)  
391 [19%20Pandemic%20on%20Immunization%20Services%20in%20Indonesia.pdf](https://www.unicef.org/indonesia/media/4811/file/Rapid%20Assessment:%20Impact%20of%20COVID-19%20Pandemic%20on%20Immunization%20Services%20in%20Indonesia.pdf)
- 392 18 World Health Organization (WHO). Guiding principles for immunization activities during the COVID-19  
393 pandemic: interim guidance. Geneva, Switzerland: : WHO 2020. [https://www.who.int/publications-detail-](https://www.who.int/publications-detail-redirect/guiding-principles-for-immunization-activities-during-the-covid-19-pandemic-interim-guidance)  
394 [redirect/guiding-principles-for-immunization-activities-during-the-covid-19-pandemic-interim-guidance](https://www.who.int/publications-detail-redirect/guiding-principles-for-immunization-activities-during-the-covid-19-pandemic-interim-guidance)  
395 (accessed 3 Aug 2020).
- 396 19 World Health Organization (WHO). Framework for decision-making: implement of mass vaccination  
397 campaigns in the context of COVID-19. Interim guidance. Geneva, Switzerland: : WHO 2020.  
398 [https://apps.who.int/iris/bitstream/handle/10665/332159/WHO-2019-nCoV-](https://apps.who.int/iris/bitstream/handle/10665/332159/WHO-2019-nCoV-Framework_Mass_Vaccination-2020.1-eng.pdf)  
399 [Framework\\_Mass\\_Vaccination-2020.1-eng.pdf](https://apps.who.int/iris/bitstream/handle/10665/332159/WHO-2019-nCoV-Framework_Mass_Vaccination-2020.1-eng.pdf)

- 400 20 World Health Organization (WHO). Maintaining essential health services: operational guidance for the  
401 COVID-19 context interim guidance. Geneva, Switzerland: : WHO 2020.  
402 <https://www.who.int/publications/i/item/WHO-2019-nCoV-essential-health-services-2020.1>
- 403 21 World Health Organization (WHO). Immunization as an essential health service: guiding principles for  
404 immunization activities during the COVID-19 pandemic and other times of severe disruption. Geneva,  
405 Switzerland: : WHO 2020. [https://www.who.int/publications/i/item/immunization-as-an-essential-health-](https://www.who.int/publications/i/item/immunization-as-an-essential-health-service-guiding-principles-for-immunization-activities-during-the-covid-19-pandemic-and-other-times-of-severe-disruption)  
406 [service-guiding-principles-for-immunization-activities-during-the-covid-19-pandemic-and-other-times-of-](https://www.who.int/publications/i/item/immunization-as-an-essential-health-service-guiding-principles-for-immunization-activities-during-the-covid-19-pandemic-and-other-times-of-severe-disruption)  
407 [severe-disruption](https://www.who.int/publications/i/item/immunization-as-an-essential-health-service-guiding-principles-for-immunization-activities-during-the-covid-19-pandemic-and-other-times-of-severe-disruption)
- 408 22 TechNet. TechNet Resource Library on immunization resources. TechNet-21. [https://www.technet-](https://www.technet-21.org/en/library?t=222-covid-19)  
409 [21.org/en/library?t=222-covid-19](https://www.technet-21.org/en/library?t=222-covid-19) (accessed 4 Aug 2020).
- 410 23 PATH. COVID-19 Essential Health Services Policy Tracker Dashboard.  
411 [https://tableau.path.org/t/BMGF/views/COVID-](https://tableau.path.org/t/BMGF/views/COVID-19EHSPolicyTrackerDashboard/Welcome?:isGuestRedirectFromVizportal=y&:embed=y)  
412 [19EHSPolicyTrackerDashboard/Welcome?:isGuestRedirectFromVizportal=y&:embed=y](https://tableau.path.org/t/BMGF/views/COVID-19EHSPolicyTrackerDashboard/Welcome?:isGuestRedirectFromVizportal=y&:embed=y)
- 413 24 Last Mile Health. EPI RED Categorization Tool for Liberia [dataset]. 2020.
- 414 25 Expanded Programme on Immunization, Ministry of Health. Infection Prevention and Control Guide for  
415 Vaccinators. Liberia: : EPI, MOH 2020.
- 416 26 Nepali Times. Nepal ends COVID-19 lockdown. [https://www.nepalitimes.com/latest/nepal-ends-covid-19-](https://www.nepalitimes.com/latest/nepal-ends-covid-19-lockdown/)  
417 [lockdown/](https://www.nepalitimes.com/latest/nepal-ends-covid-19-lockdown/) (accessed 11 Dec 2020).
- 418 27 Kandel N, Lamichhane J. Female health volunteers of Nepal: the backbone of health care. *The Lancet*  
419 2019;**393**:e19–20. doi:10.1016/S0140-6736(19)30207-7
- 420 28 Gavi, the Vaccine Alliance. Delivering life-saving vaccines during the COVID-19 pandemic.  
421 2020.<https://www.gavi.org/vaccineswork/delivering-life-saving-vaccines-during-covid-19-pandemic>  
422 (accessed 7 Aug 2020).
- 423 29 World Health Organization (WHO). Nepal introduces Rota virus vaccine against diarrhoea in children:  
424 National Immunization Programme achieves new milestone. [https://www.who.int/nepal/news/detail/02-](https://www.who.int/nepal/news/detail/02-07-2020-nepal-introduces-rota-virus-vaccine-against-diarrhoea-in-children-national-immunization-programme-achieves-new-milestone)  
425 [07-2020-nepal-introduces-rota-virus-vaccine-against-diarrhoea-in-children-national-immunization-](https://www.who.int/nepal/news/detail/02-07-2020-nepal-introduces-rota-virus-vaccine-against-diarrhoea-in-children-national-immunization-programme-achieves-new-milestone)  
426 [programme-achieves-new-milestone](https://www.who.int/nepal/news/detail/02-07-2020-nepal-introduces-rota-virus-vaccine-against-diarrhoea-in-children-national-immunization-programme-achieves-new-milestone) (accessed 4 Aug 2020).
- 427 30 Gavi, the Vaccine Alliance. COVID-19 Situation Report 9. Geneva, Switzerland: : Gavi 2020.  
428 [https://www.gavi.org/sites/default/files/document/2020/Gavi-COVID-19-Situation-Report-9-](https://www.gavi.org/sites/default/files/document/2020/Gavi-COVID-19-Situation-Report-9-05192020_0.pdf)  
429 [05192020\\_0.pdf](https://www.gavi.org/sites/default/files/document/2020/Gavi-COVID-19-Situation-Report-9-05192020_0.pdf)
- 430 31 Pan American Health Organization (PAHO). PAHO urges countries to maintain vaccination during COVID-19  
431 pandemic. 2020.[http://www.paho.org/en/news/26-4-2020-paho-urges-countries-maintain-vaccination-](http://www.paho.org/en/news/26-4-2020-paho-urges-countries-maintain-vaccination-during-covid-19-pandemic)  
432 [during-covid-19-pandemic](http://www.paho.org/en/news/26-4-2020-paho-urges-countries-maintain-vaccination-during-covid-19-pandemic) (accessed 4 Aug 2020).
- 433 32 World Health Organization (WHO). How WHO is supporting ongoing vaccination efforts during the COVID-19  
434 pandemic. 2020.[https://www.who.int/news-room/feature-stories/detail/how-who-is-supporting-ongoing-](https://www.who.int/news-room/feature-stories/detail/how-who-is-supporting-ongoing-vaccination-efforts-during-the-covid-19-pandemic)  
435 [vaccination-efforts-during-the-covid-19-pandemic](https://www.who.int/news-room/feature-stories/detail/how-who-is-supporting-ongoing-vaccination-efforts-during-the-covid-19-pandemic) (accessed 4 Aug 2020).

- 436 33 Putting Women and Children First: Immunization Resumes in Sri Lanka amidst the COVID-19 Pandemic.  
437 [https://www.who.int/southeastasia/news/feature-stories/detail/putting-women-and-children-first-](https://www.who.int/southeastasia/news/feature-stories/detail/putting-women-and-children-first-immunization-resumes-in-sri-lanka-amidst-the-covid-19-pandemic)  
438 [immunization-resumes-in-sri-lanka-amidst-the-covid-19-pandemic](https://www.who.int/southeastasia/news/feature-stories/detail/putting-women-and-children-first-immunization-resumes-in-sri-lanka-amidst-the-covid-19-pandemic) (accessed 11 Dec 2020).
- 439 34 Gadzo M. Pakistan resumes polio vaccinations after coronavirus hiatus.  
440 [https://www.aljazeera.com/news/2020/07/pakistan-resumes-polio-vaccinations-coronavirus-hiatus-](https://www.aljazeera.com/news/2020/07/pakistan-resumes-polio-vaccinations-coronavirus-hiatus-200720071328769.html)  
441 [200720071328769.html](https://www.aljazeera.com/news/2020/07/pakistan-resumes-polio-vaccinations-coronavirus-hiatus-200720071328769.html) (accessed 4 Aug 2020).
- 442 35 Gavi, the Vaccine Alliance. COVID-19 Situation Report 13. Geneva, Switzerland: Gavi 2020.  
443 <https://www.gavi.org/sites/default/files/covid/Gavi-COVID-19-Situation-Report-13-20200714.pdf>
- 444 36 Ethiopia vaccinates nearly 15 million children against measles despite COVID-19 challenges. WHO Reg. Off.  
445 Afr. [https://www.afro.who.int/news/ethiopia-vaccinates-nearly-15-million-children-against-measles-](https://www.afro.who.int/news/ethiopia-vaccinates-nearly-15-million-children-against-measles-despite-covid-19-challenges)  
446 [despite-covid-19-challenges](https://www.afro.who.int/news/ethiopia-vaccinates-nearly-15-million-children-against-measles-despite-covid-19-challenges) (accessed 11 Dec 2020).
- 447 37 Chandir S, Siddiqi DA, Setayesh H, *et al*. Impact of COVID-19 lockdown on routine immunisation in Karachi,  
448 Pakistan. *Lancet Glob Health* 2020;0. doi:10.1016/S2214-109X(20)30290-4
- 449 38 Ghana's community nurses deliver child health care amid COVID-19. WHO Reg. Off. Afr.  
450 <https://www.afro.who.int/news/ghanas-community-nurses-deliver-child-health-care-amid-covid-19>  
451  [\(accessed 11 Dec 2020\).](https://www.afro.who.int/news/ghanas-community-nurses-deliver-child-health-care-amid-covid-19)
- 452 39 Burkina Faso resumes polio vaccination campaigns under strict COVID-19 prevention measures. WHO Reg.  
453 Off. Afr. [https://www.afro.who.int/news/burkina-faso-resumes-polio-vaccination-campaigns-under-strict-](https://www.afro.who.int/news/burkina-faso-resumes-polio-vaccination-campaigns-under-strict-covid-19-prevention-measures)  
454 [covid-19-prevention-measures](https://www.afro.who.int/news/burkina-faso-resumes-polio-vaccination-campaigns-under-strict-covid-19-prevention-measures) (accessed 11 Dec 2020).
- 455
- 456
